# Supplementary material for: GSAP modulates γ-secretase specificity by inducing conformational change in PS1
Source: PubMed Central journal article supplement — Proc Natl Acad Sci U S A. 2019 Mar 8;116(13):6385–90. doi: 10.1073/pnas.1820160116 (PMC6442608; doi:10.1073/pnas.1820160116), 2019-03-08
Supplement: pnas.1820160116.sapp.pdf [file pnas.1820160116.sapp.pdf]

## Supplementary Information for

GSAP modulates  $\gamma$ -secretase specificity by inducing conformational change in PS1

Eitan Wong<sup>1,2</sup>, George P. Liao<sup>1,3</sup>, Jerry C. Chang<sup>2</sup>, Peng Xu<sup>2</sup>, Yue-Ming Li<sup>1,3\*</sup> and Paul Greengard<sup>2\*</sup>

<sup>1</sup> Chemical Biology Program, Memorial Sloan Kettering Cancer Center, New York, NY 10065

<sup>2</sup> Laboratory of Molecular and Cellular Neuroscience, The Rockefeller University, New York, NY 10065

<sup>3</sup> Program of Pharmacology, Weill Graduate School of Medical Sciences of Cornell University, New York, NY 10021

**This PDF file includes:**

Figs. S1-S3

Figure S1

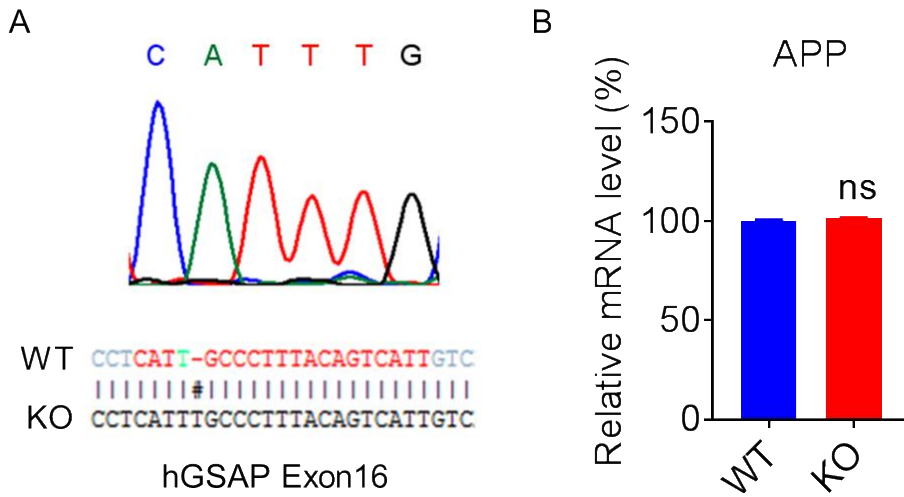

Figure S1. **HEK-APP GSAP KO conformation and APP expression.** CRISPR gRNA targeting exon 16 (A), sequence chromatogram of HEK-APP GSAP KO in the targeted region (upper panel) and sequence alignment of HEK-APP WT versus KO in exon16 (lower panel, CRISPR gDNA in red and last PAM nucleotide in green). APP mRNA levels in HEK-APP WT versus HEK-APP GSAP KO cells (B).

Figure S2

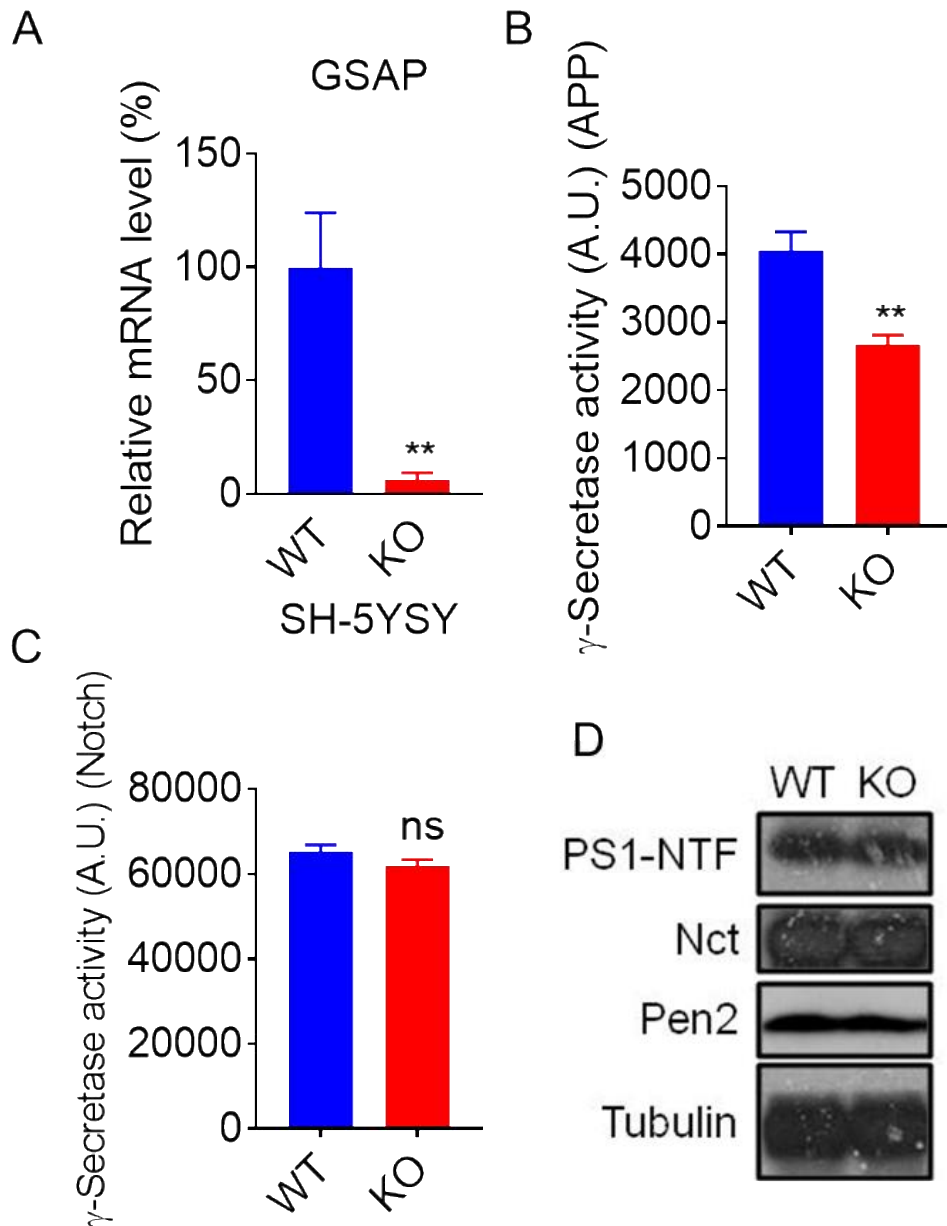

Figure S2. **SH-5YSY GSAP KO reduces  $\gamma$ -secretase activity for APP.** GSAP mRNA levels in SH-5YSY cells versus CRISPR GSAP KO cells (A).  $\gamma$ -Secretase activity levels toward recombinant APP (B) are decreased in GSAP KO SH-5YSY compared to GSAP WT counterpart but remained unchanged for recombinant Notch (C). All data represent means  $\pm$ SEM; n=6. (D) Western blot analysis of  $\gamma$ -secretase subunits PS1-NTF, Nct, and Pen2 in SH5-YSY WT and KO (p-value \*\*< 0.01).

Figure S3

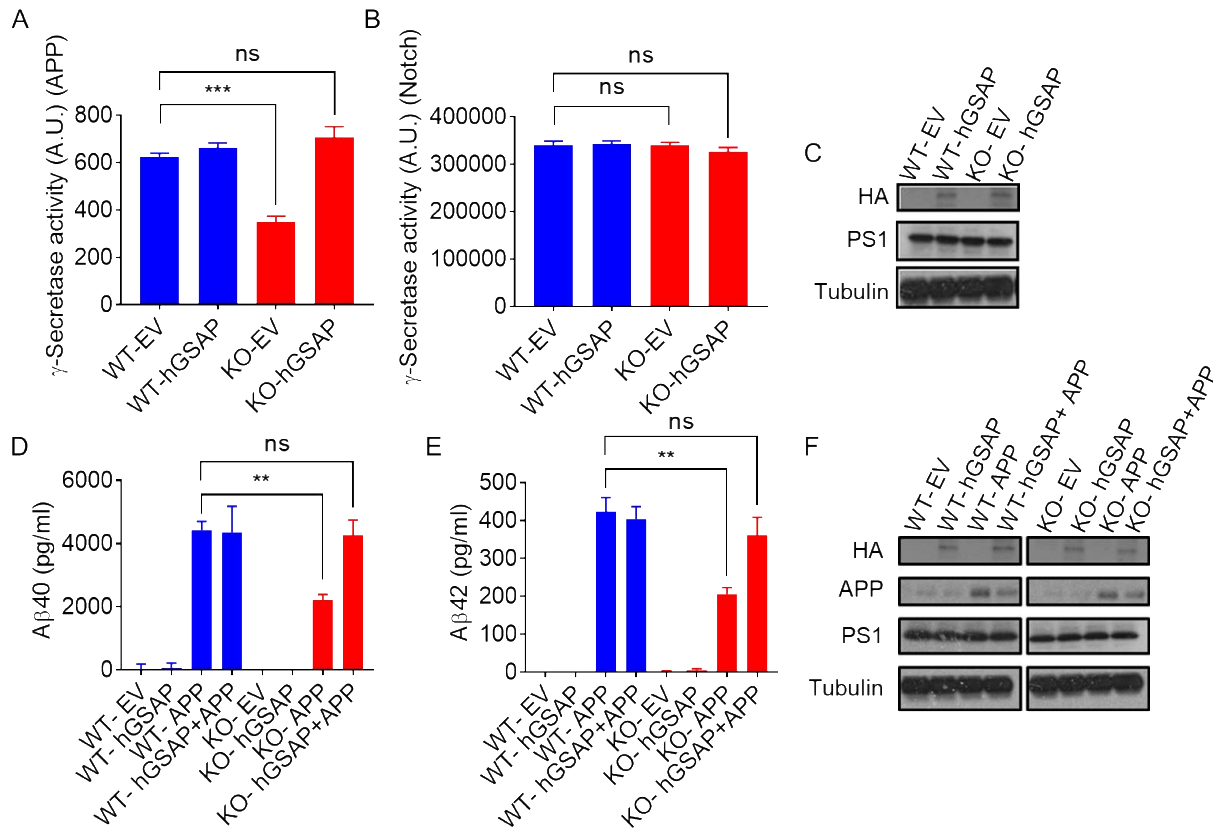

**Figure S3. Overexpression of hGSAP in SH-5YSY GSAP KO cells rescues  $\gamma$ -secretase activity and A $\beta$  secretion.** Membrane fractions prepared 48 hours post transfection of EV and hGSAP in SH-5YSY GSAP WT or KO were assayed for  $\gamma$ -secretase activity using recombinant APP (A) or Notch (B). Western blot analysis of HA (hGSAP) and PS1-NTF in SH-5YSY WT and KO confirming GSAP expression which had no effect on PS1 (C). A $\beta$  analysis was done on SH-5YSY WT or KO transfected with Empty vector (EV) or full-length human GSAP (hGSAP). To detect A $\beta$  levels the cells were transfected either with APP or hGSAP+APP. A $\beta$  secretion was measured 48 hours post-transfection using MSD A $\beta$  detection kit; A $\beta$ 40 (D) and A $\beta$ 42 (E). All data represent means  $\pm$ SEM; n=3. (F) Western blot analysis of HA (hGSAP), APP and PS1-NTF in SH-5YSY WT and KO transfected with: EV, hGSAP, APP or hGSAP+APP confirming the expression of hGSAP or APP in the indicated cells (p-value \*\* < 0.01; \*\*\*<0.001).
